# Supplementary material for: Internal hydrogen bonding and amide co-ordination in zinc(ii) complexes of a tripodal N4 ligand: structural, spectroscopic and reactivity studies
Source: Royal Society of Chemistry journal article supplement (doi:10.1039/b301651j), 2003-01-01
Supplement: b301651j.pdf [file b301651j.pdf]

## ELECTRONIC SUPPLEMENTARY INFORMATION (ESI)

**Internal hydrogen bonding and amide co-ordination in zinc(II) complexes of a tripodal N4 ligand: Structural, spectroscopic and reactivity studies.**

**Juan C. Mareque Rivas\*, Rafael Torres Martín de Rosales and Simon Parsons**

*School of Chemistry, The University of Edinburgh, Joseph Black Building, King's Buildings, West Mains Road, Edinburgh, EH9 3JJ, UK.*

---

### Figure captions

**Fig. S1** An ORTEP plot drawn with 30 % probability thermal ellipsoids showing intermolecular N(7)-H(7N)···N(12) hydrogen bonding in the crystal structure of bppapa.

**Fig. S2** An ORTEP plot drawn with 50 % probability thermal ellipsoids showing hydrogen bonding between the [(bppapa)Zn]<sup>2+</sup> cation and one of the PF<sub>6</sub><sup>-</sup> anions in the crystal structure of **1**·0.5MeOH.

**Fig. S3** Aromatic and NH region of the <sup>1</sup>H NMR spectra (360.1 MHz, CD<sub>3</sub>CN) of **1** at 323 K (*top*) and 293 K (*bottom*).

**Fig. S4** Aromatic and NH region of the <sup>1</sup>H NMR spectra (360.1 MHz, CD<sub>3</sub>CN/CD<sub>3</sub>OH 6:1, 323 K) of (i) **1** (0.046 mM), (ii) **1** (0.046 mM) mixed with MeNOH·5H<sub>2</sub>O (0.046) after 60 s; (iii) **1** (0.046 mM) mixed with MeNOH·5H<sub>2</sub>O (0.046) after 7.5 h; (iv) [(bpapa)Zn(NCCH<sub>3</sub>)](PF<sub>6</sub>)<sub>2</sub> (0.046 mM) mixed with

MeNOH·5H<sub>2</sub>O (0.046) and (CH<sub>3</sub>)<sub>3</sub>CCOOH (0.046 mM) after 60 s and (v) [(bpapa)Zn(NCCH<sub>3</sub>)](PF<sub>6</sub>)<sub>2</sub> (0.046 mM).

**Fig. S5** Aromatic and NH region of the <sup>1</sup>H NMR (360.1 MHz, CD<sub>3</sub>CN/CD<sub>3</sub>OH 6:1, 323 K) of (i) bppapa (0.046 mM), (ii) bppapa (0.046 mM) mixed with MeNOH·5H<sub>2</sub>O (0.046) after 7.5 h s; (iii) bppapa (0.046 mM) mixed with MeNOH·5H<sub>2</sub>O (0.046) after 10 days; (iv) bpapa (0.046 mM).

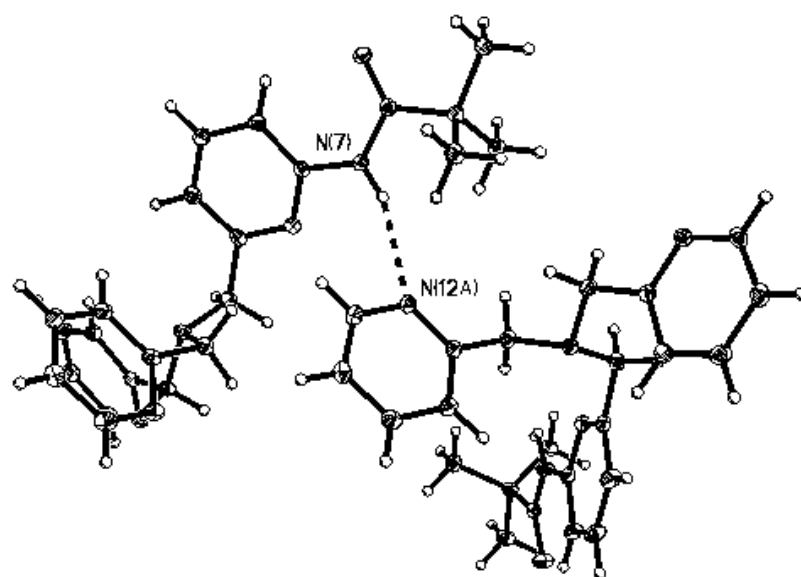

**Fig. S1** Mareque Rivas, Torres and Parsons.

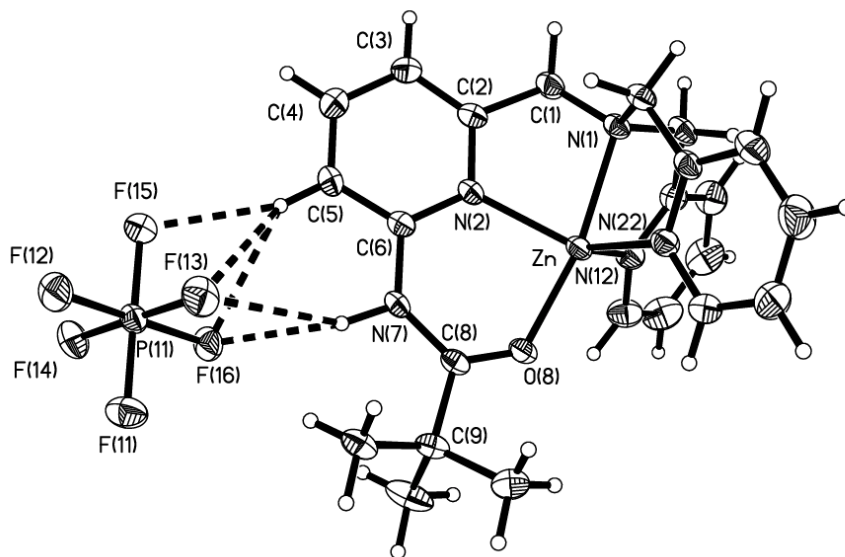

**Fig. S2** Mareque Rivas, Torres and Parsons.

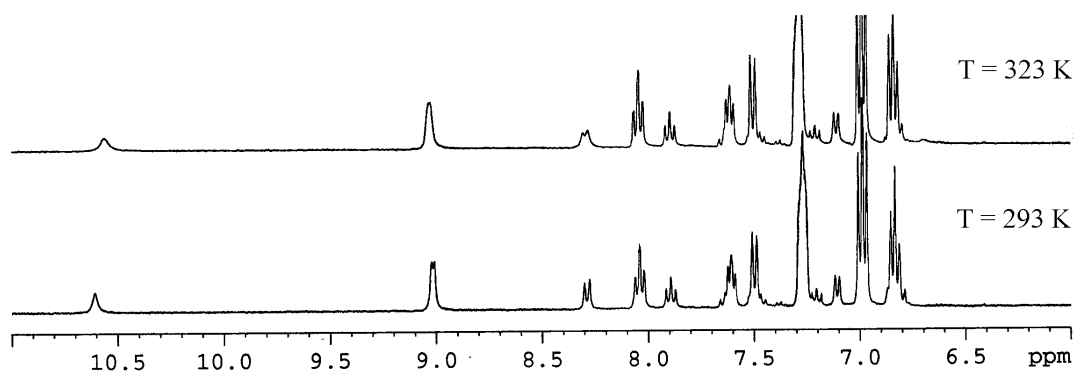

**Fig. S3** Mareque Rivas, Torres and Parsons.

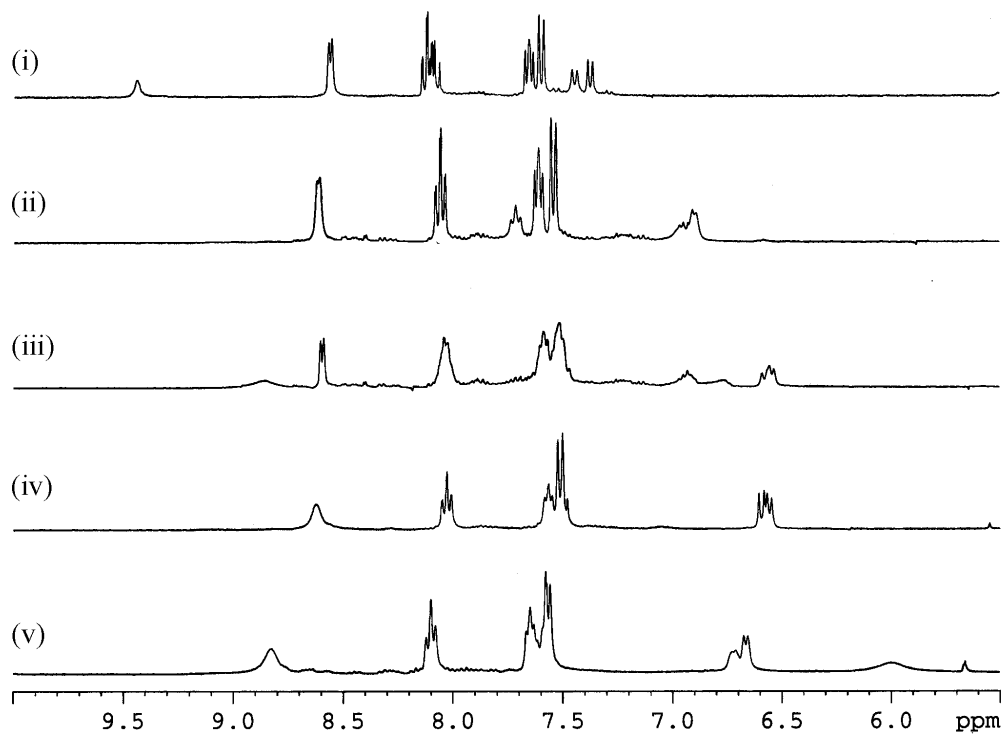

**Fig. S4** Mareque Rivas, Torres and Parsons.

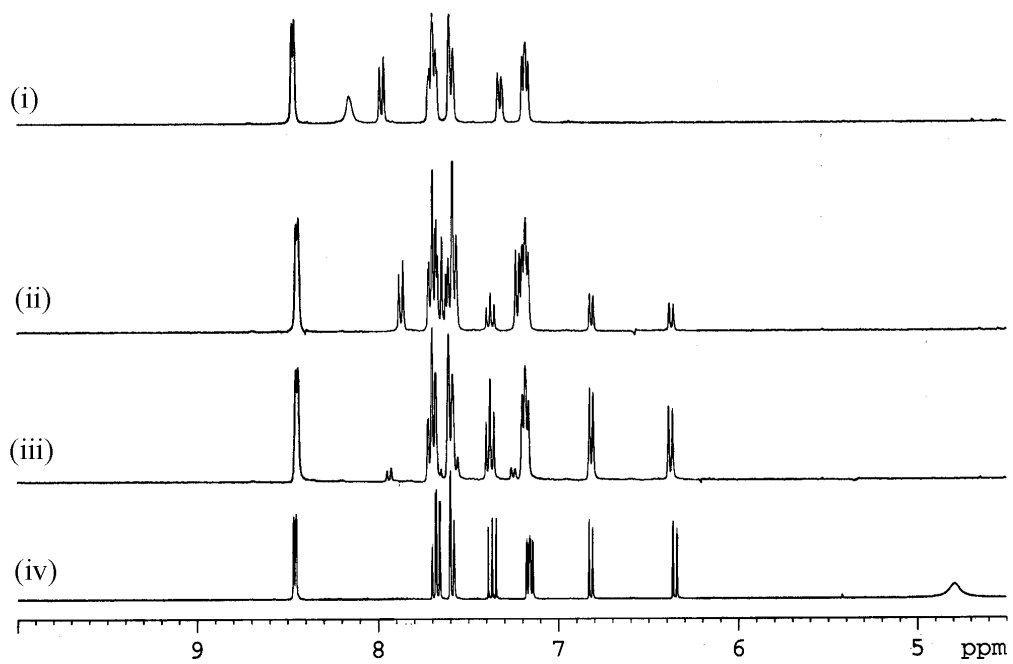

**Fig. S5** Mareque Rivas, Torres and Parsons.
